# Supplementary material for: Charge density waves in pyrochlore crystallite encapsulated by an amorphized matrix
Source: Research Square preprint supplement (doi:10.21203/rs.3.rs-6062221/v1), 2025-04-01
Supplement: Supplementary file 1 [file e6301190d1a36204fcb6bc72.docx]

**Supplementary Information**

Charge density waves in pyrochlore crystallite encapsulated by an amorphized matrix

Wenming Qi 1,2, Yang Ding 2, Hongliang Dong 2, Min Gao 1,3* and Qingyang Hu 2*

*1 Xinjiang Key Laboratory of Solid State Physics and Devices, School of Physics Science and Technology, Xinjiang University, Urumqi, People’s Republic of China*

*2 Center for High Pressure Science and Technology Advanced Research, Shanghai, People’s Republic of China*

*3 Xinjiang Laboratory of Phase Transitions and Microstructures in Condensed Matter Physics, College of Physical Science and Technology, Yili Normal University, Yining, People’s Republic of China*

**Content：**

S1. Characterizations of starting Lu2Ti2O7 sample

S2. The fitting plot of Lu2Ti2O7 at 16.1 GPa

S3. Color plots of the pressure-dependent Raman spectra of Lu2Ti2O7

S4. Pressure dependence of FWHM in the two modes of Lu2Ti2O7

S5. Pressure dependence of the Raman shift in Lu2Ti2O7

S6. The fitting plots of Lu2Ti2O7 at 39.5 GPa and release to 0.1 GPa

S7. The pressure dependence of frequency in TiO6 octahedral modes

S8. The fitting plots of Lu2Ti2O7 after release to ambient conditions

S9. Selected SAED patterns in Lu2Ti2O7 thin film

S10. Nanostructure made of amorphized structural matrix

**S1. Characterizations of starting Lu2Ti2O7 sample**


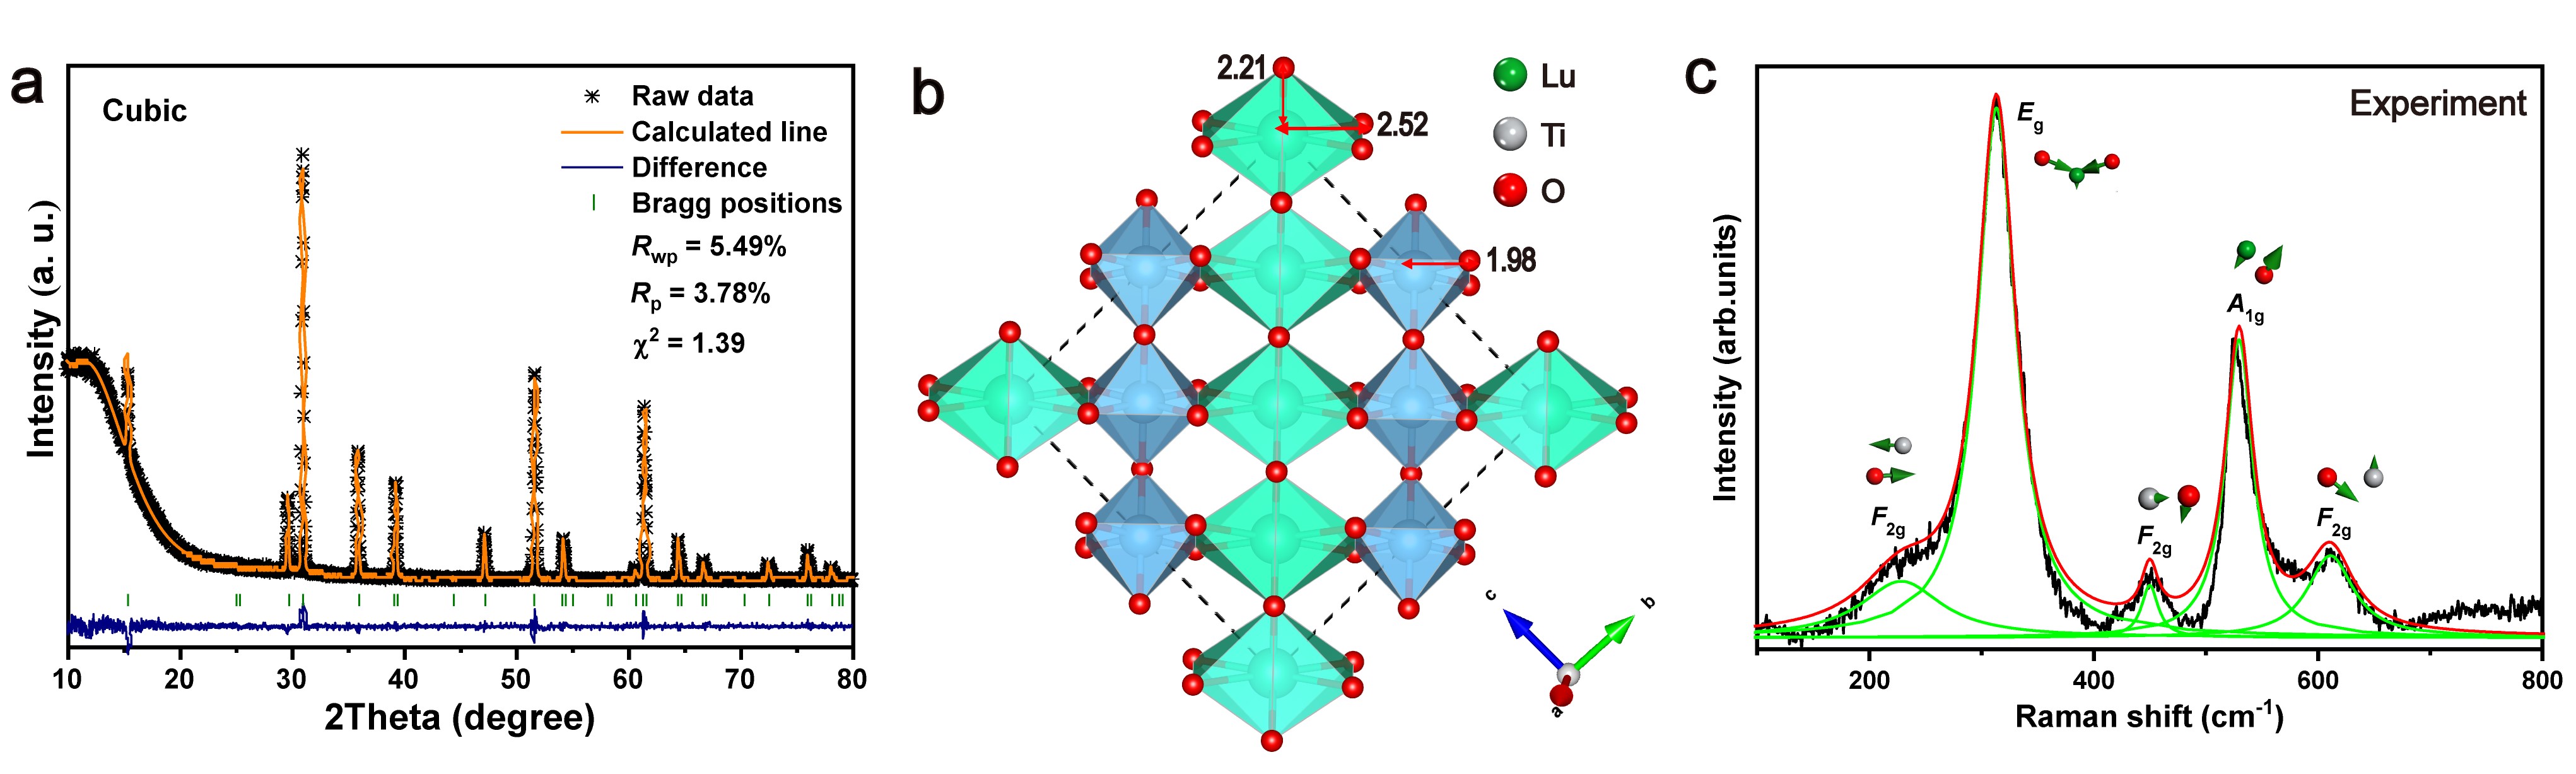


**Fig. S1 Characterizations of starting Lu2Ti2O7 sample.** (a) Rietveld refinement of XRD patterns collected at ambient conditions. (b) The pyrochlore structure of Lu2Ti2O7. (c) Lorentz fitted for the Raman spectrum of Lu2Ti2O7 at ambient conditions. Inset figures are the bonds vibration diagram of each Raman mode.

**S2. The fitting plot of Lu2Ti2O7 at 16.1 GPa**

**Fig. S2** The fitting Raman spectra of Lu2Ti2O7 at 16.1 GPa.

**S3.** **Color plots of the pressure-dependent Raman spectra of Lu2Ti2O7**


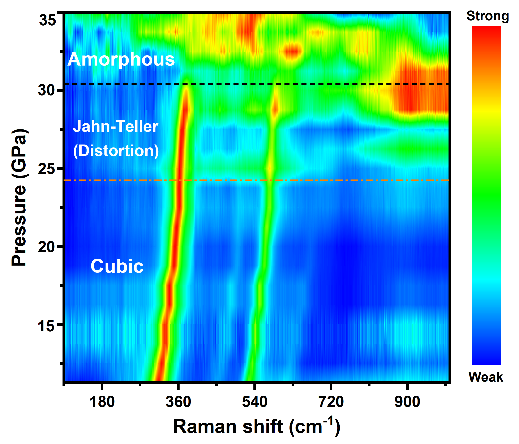


**Fig. S1** Color plots of the pressure-dependent Raman spectra of Lu2Ti2O7.

**S4.** **Pressure dependence of FWHM in the two modes of Lu2Ti2O7**


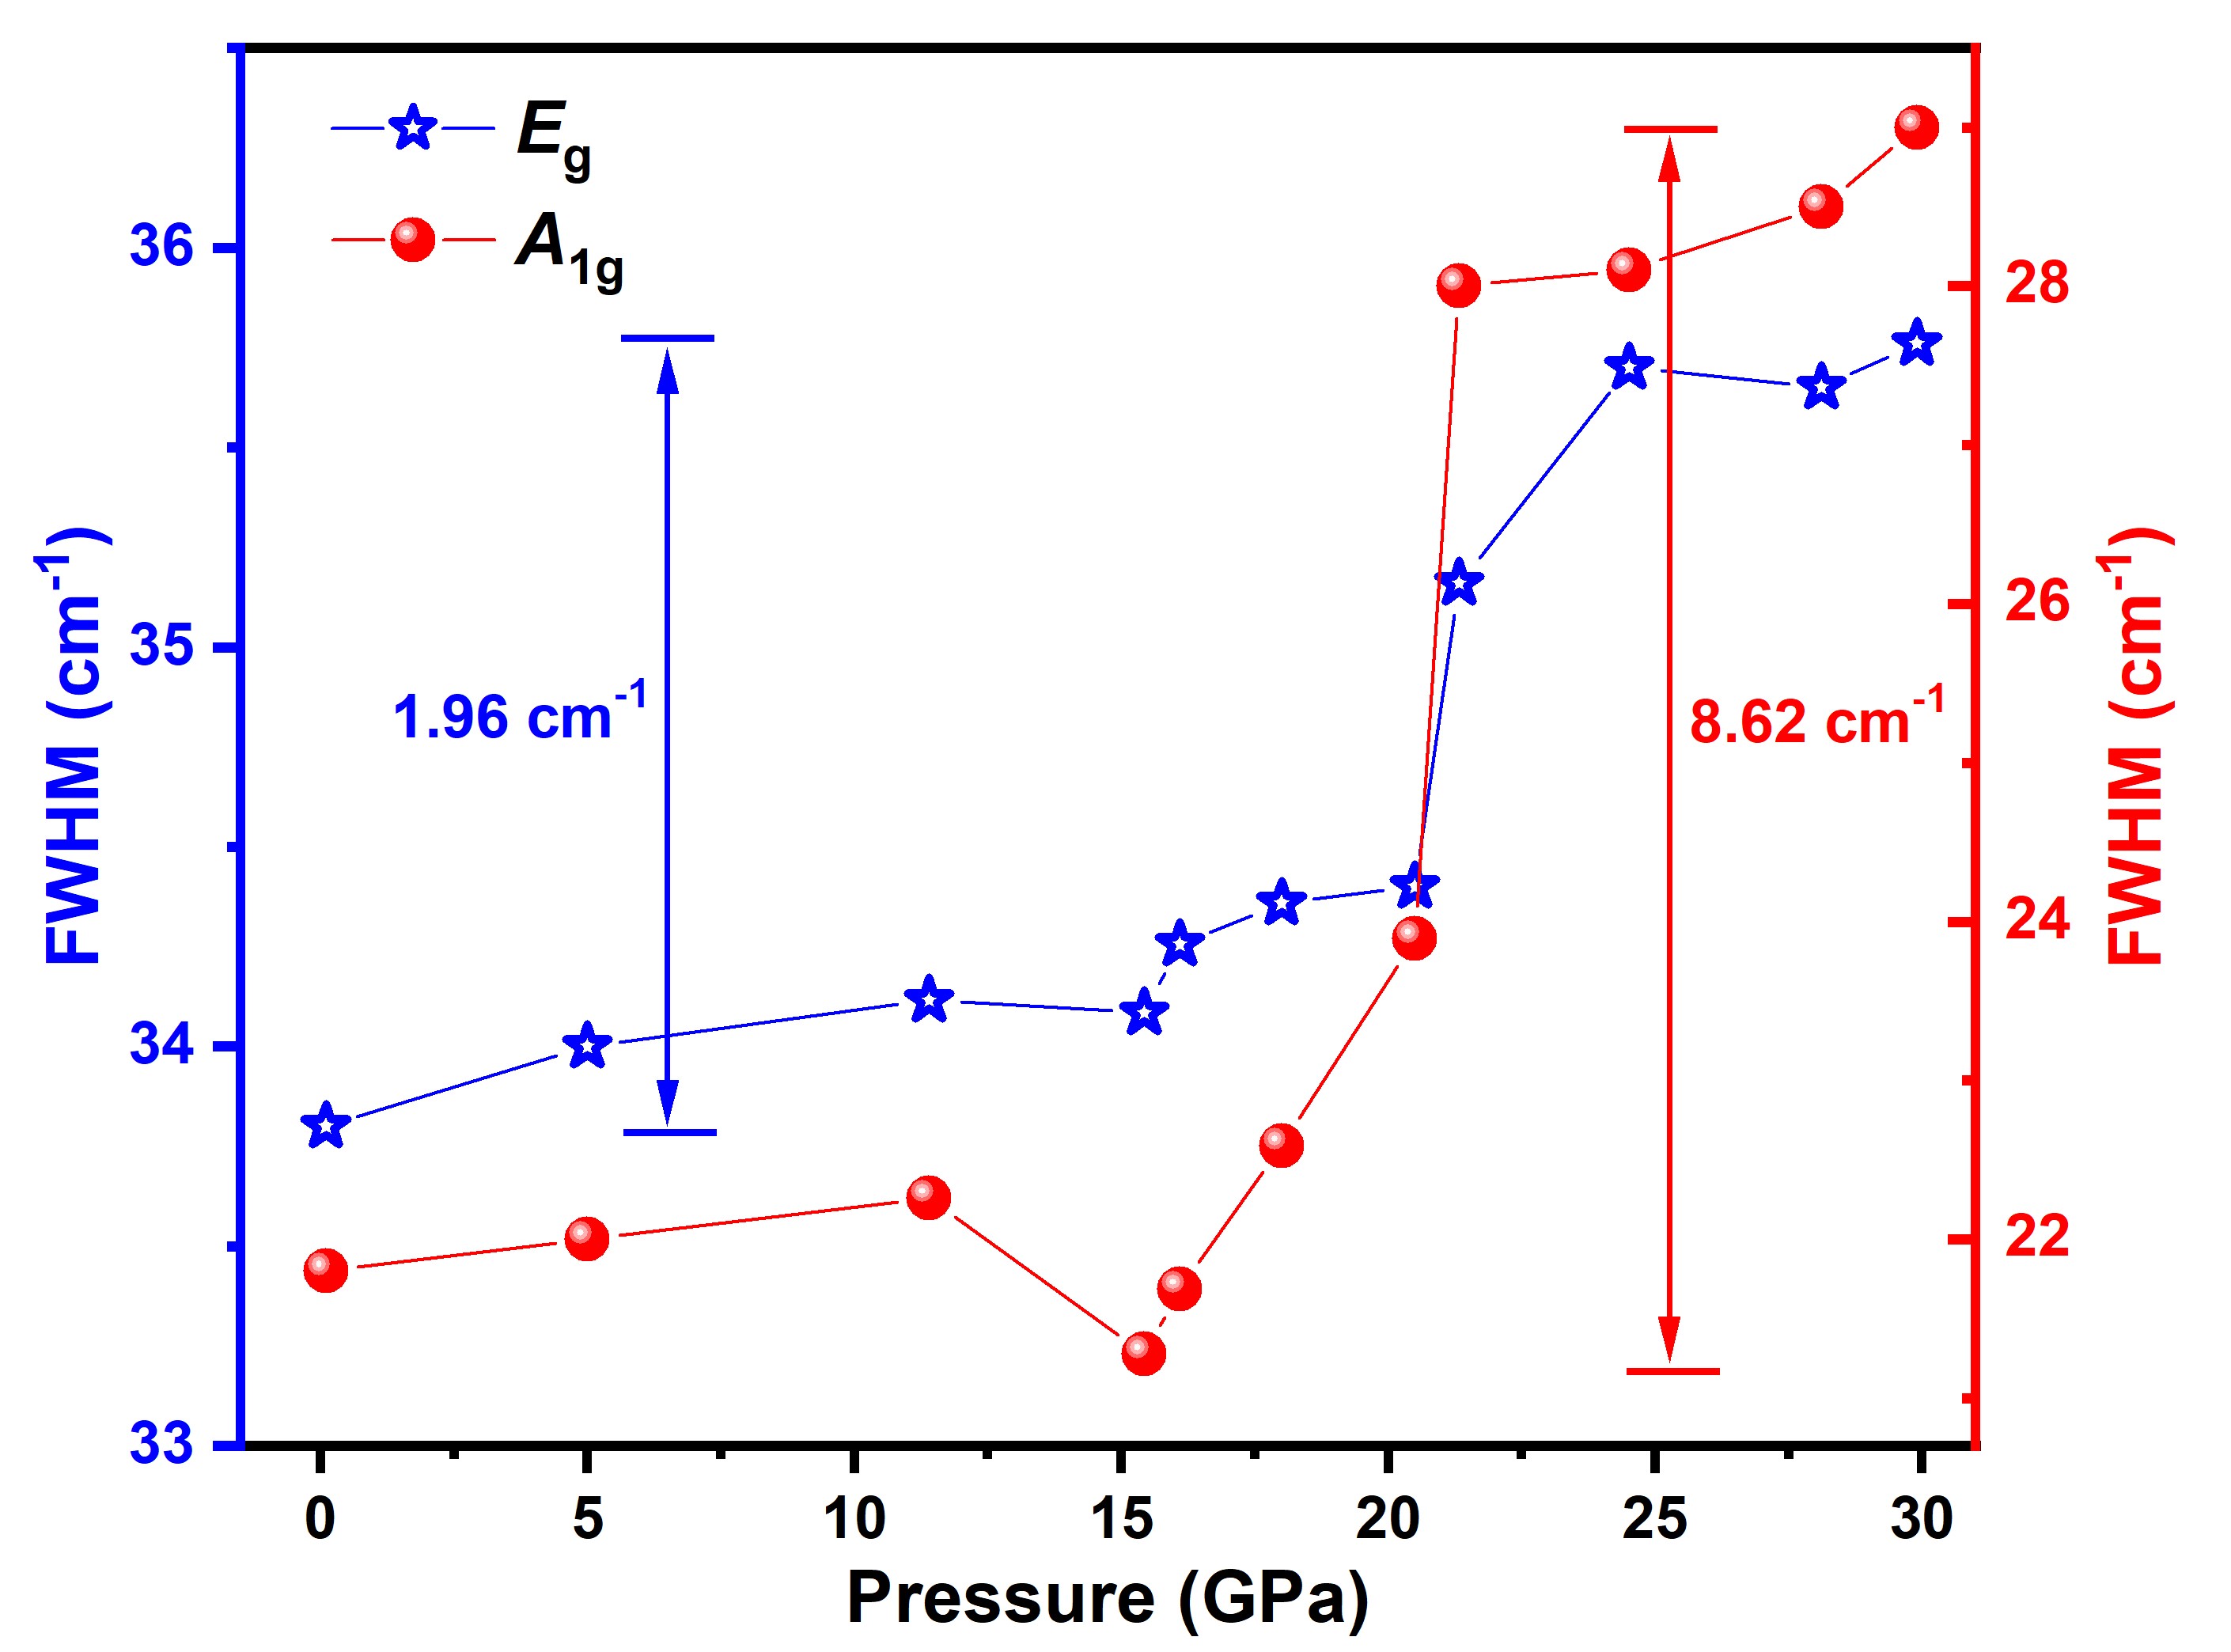


**Fig. S4** Pressure dependence of FWHM in the two modes (*E*g and *A*1g) of Lu2Ti2O7.

**S5. Pressure dependence of the Raman shift in Lu2Ti2O7**


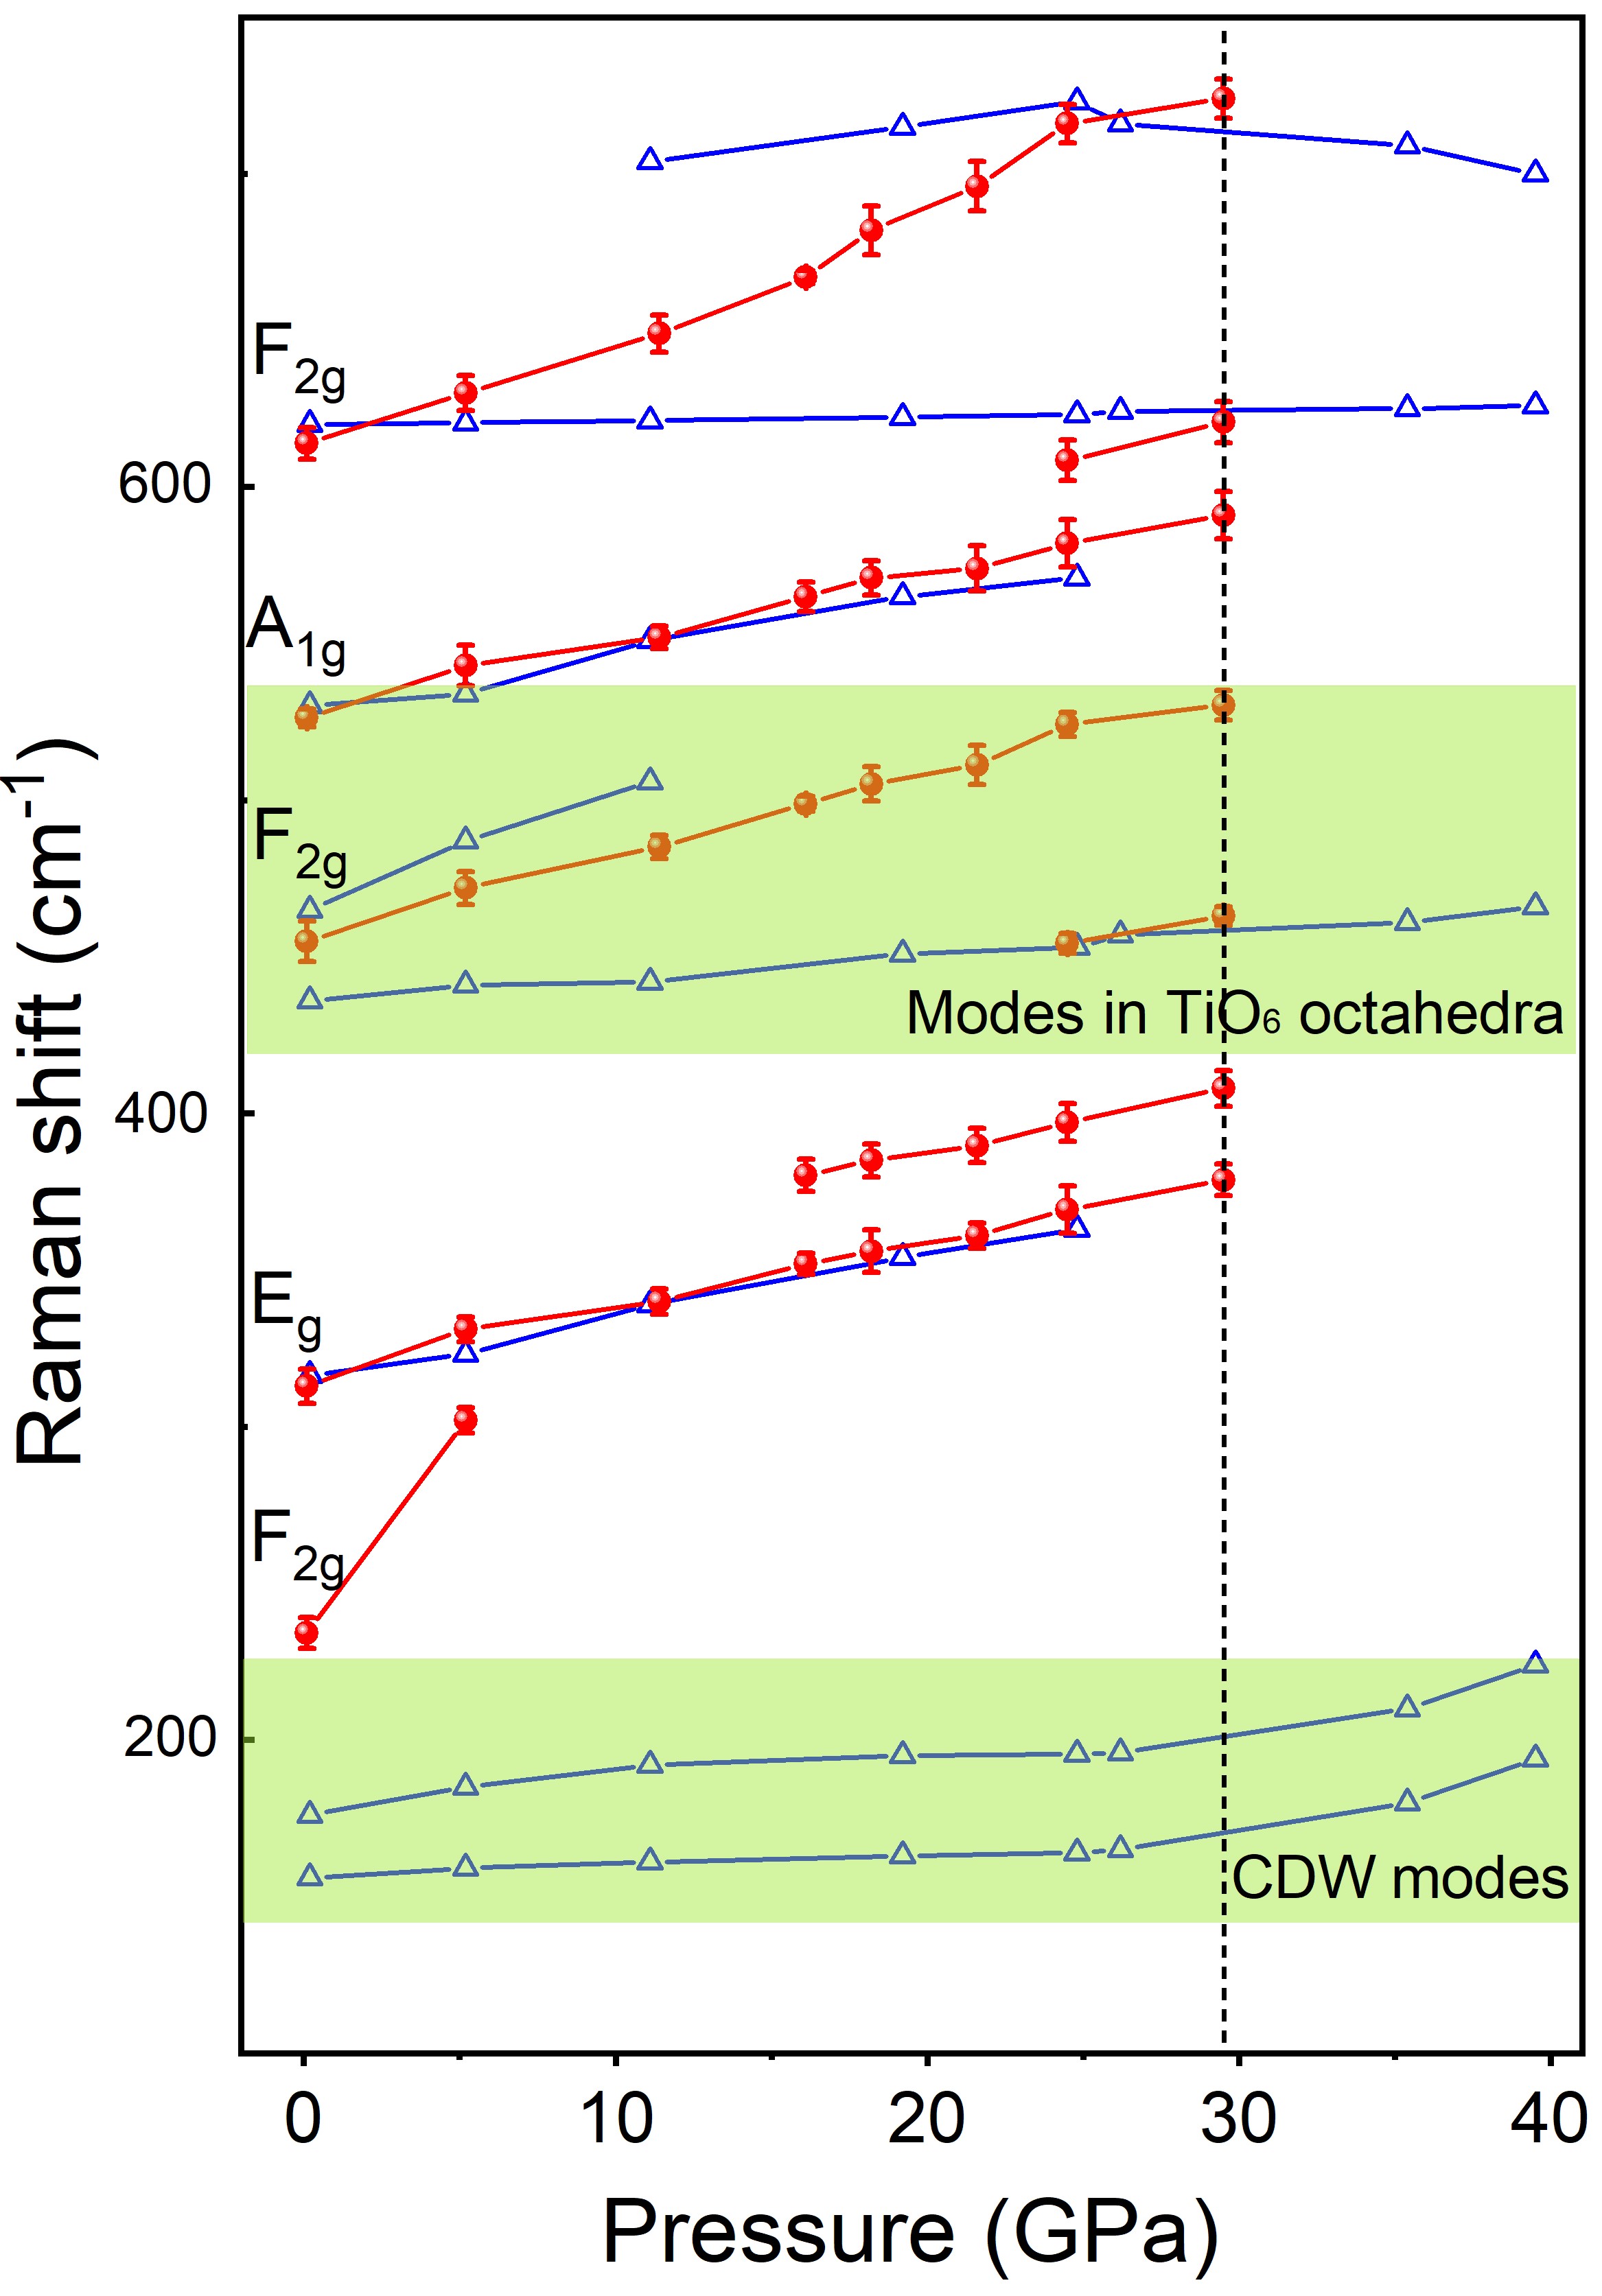


**Fig. S5** Pressure dependence of the Raman shift. Dashed line of 29.5 GPa is the onset of structural disordering and transition to the monoclinic phase. red balls, compression; blue triangles, decompression.

**S6. The fitting plots of Lu2Ti2O7 at 39.5 GPa and release to 0.1 GPa**


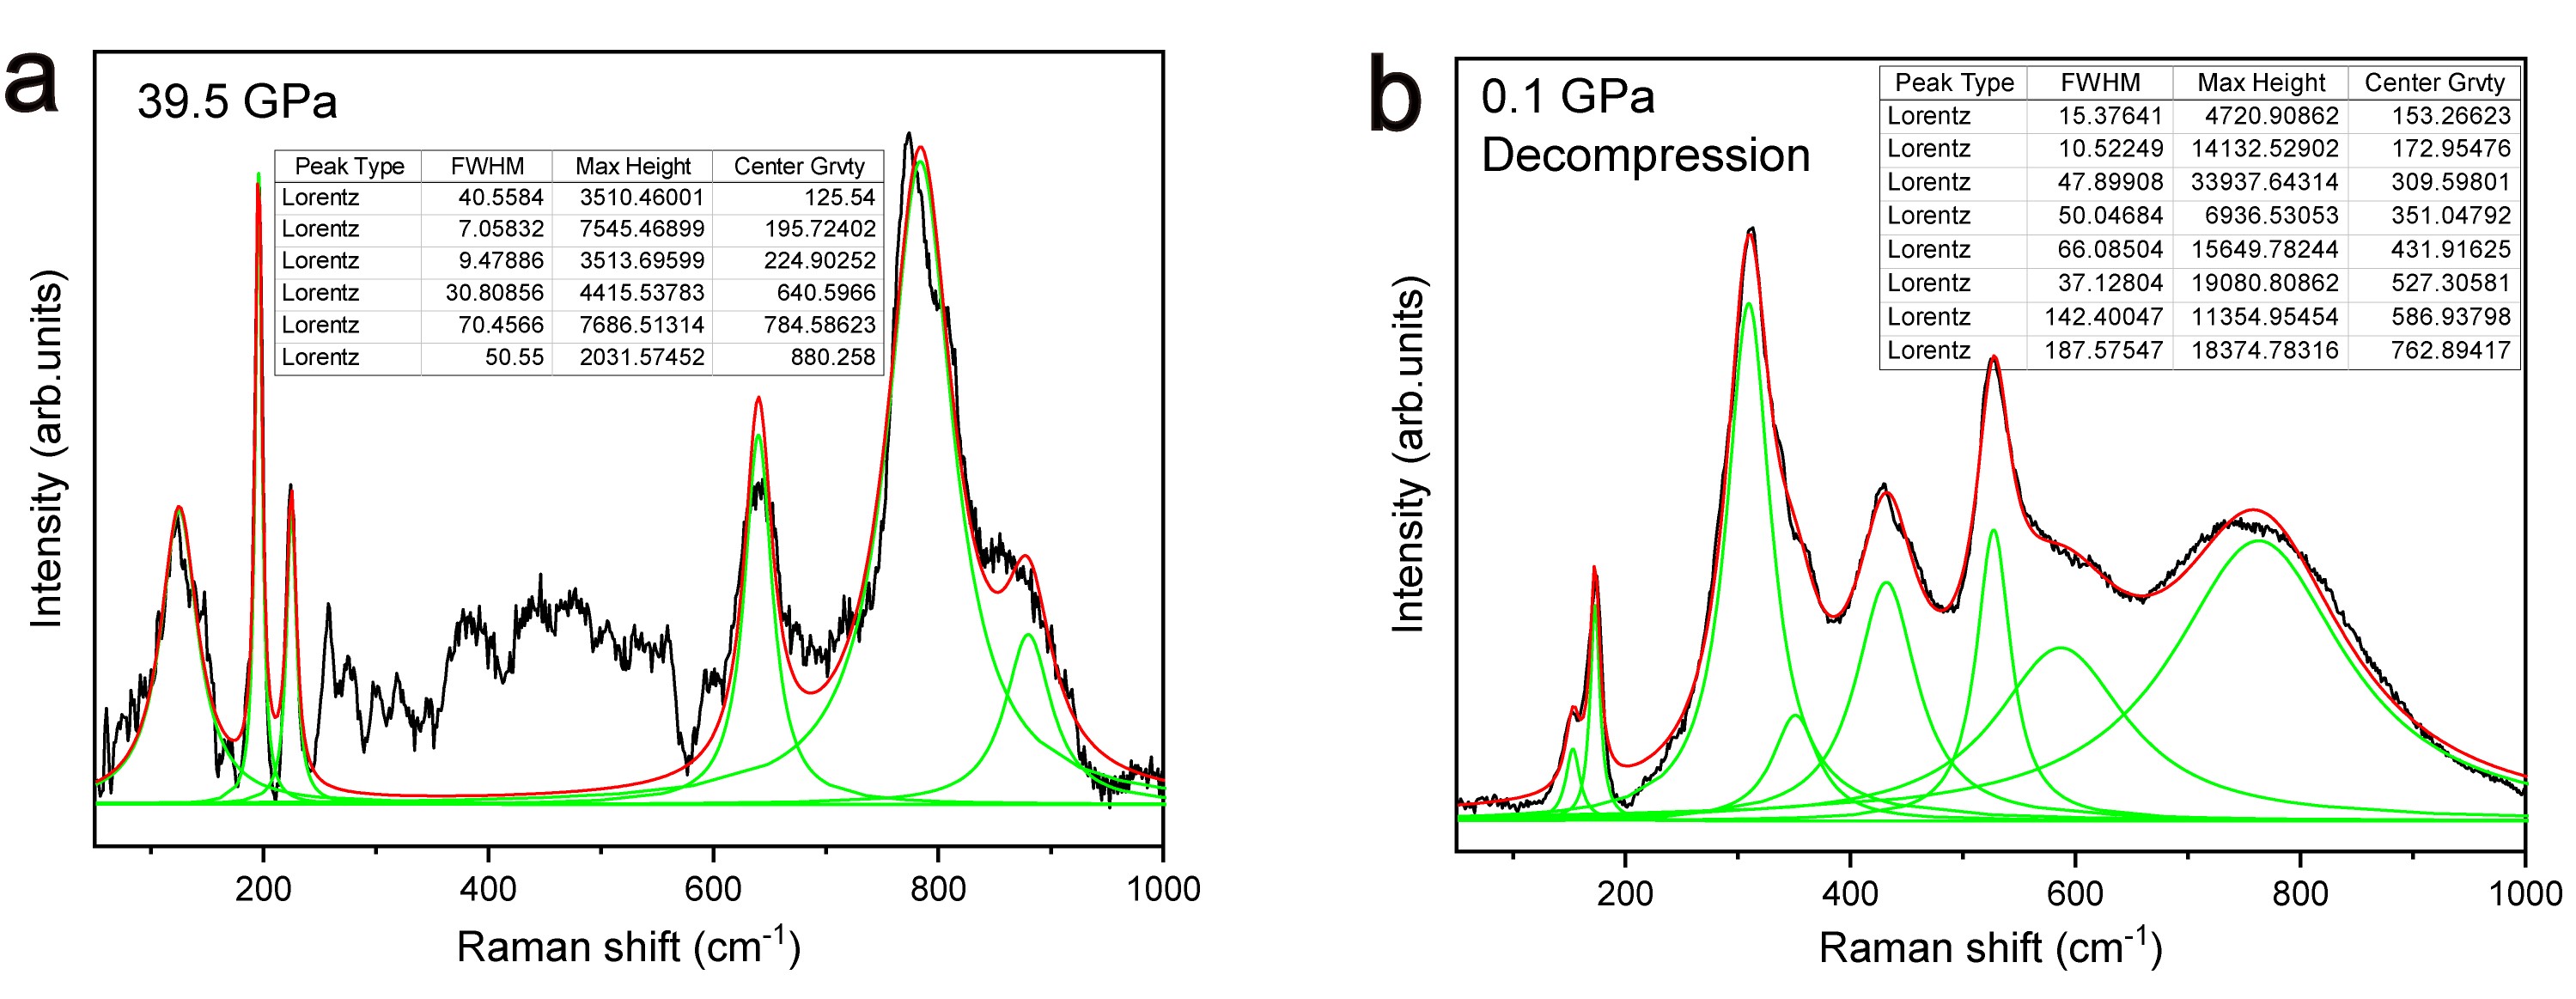


**Fig. S6** The fitting Raman spectra of Lu2Ti2O7 at (a) 39.5 GPa and (b) release to 0.1 GPa.

**S7.** **The pressure dependence of frequency in TiO6 octahedral modes**


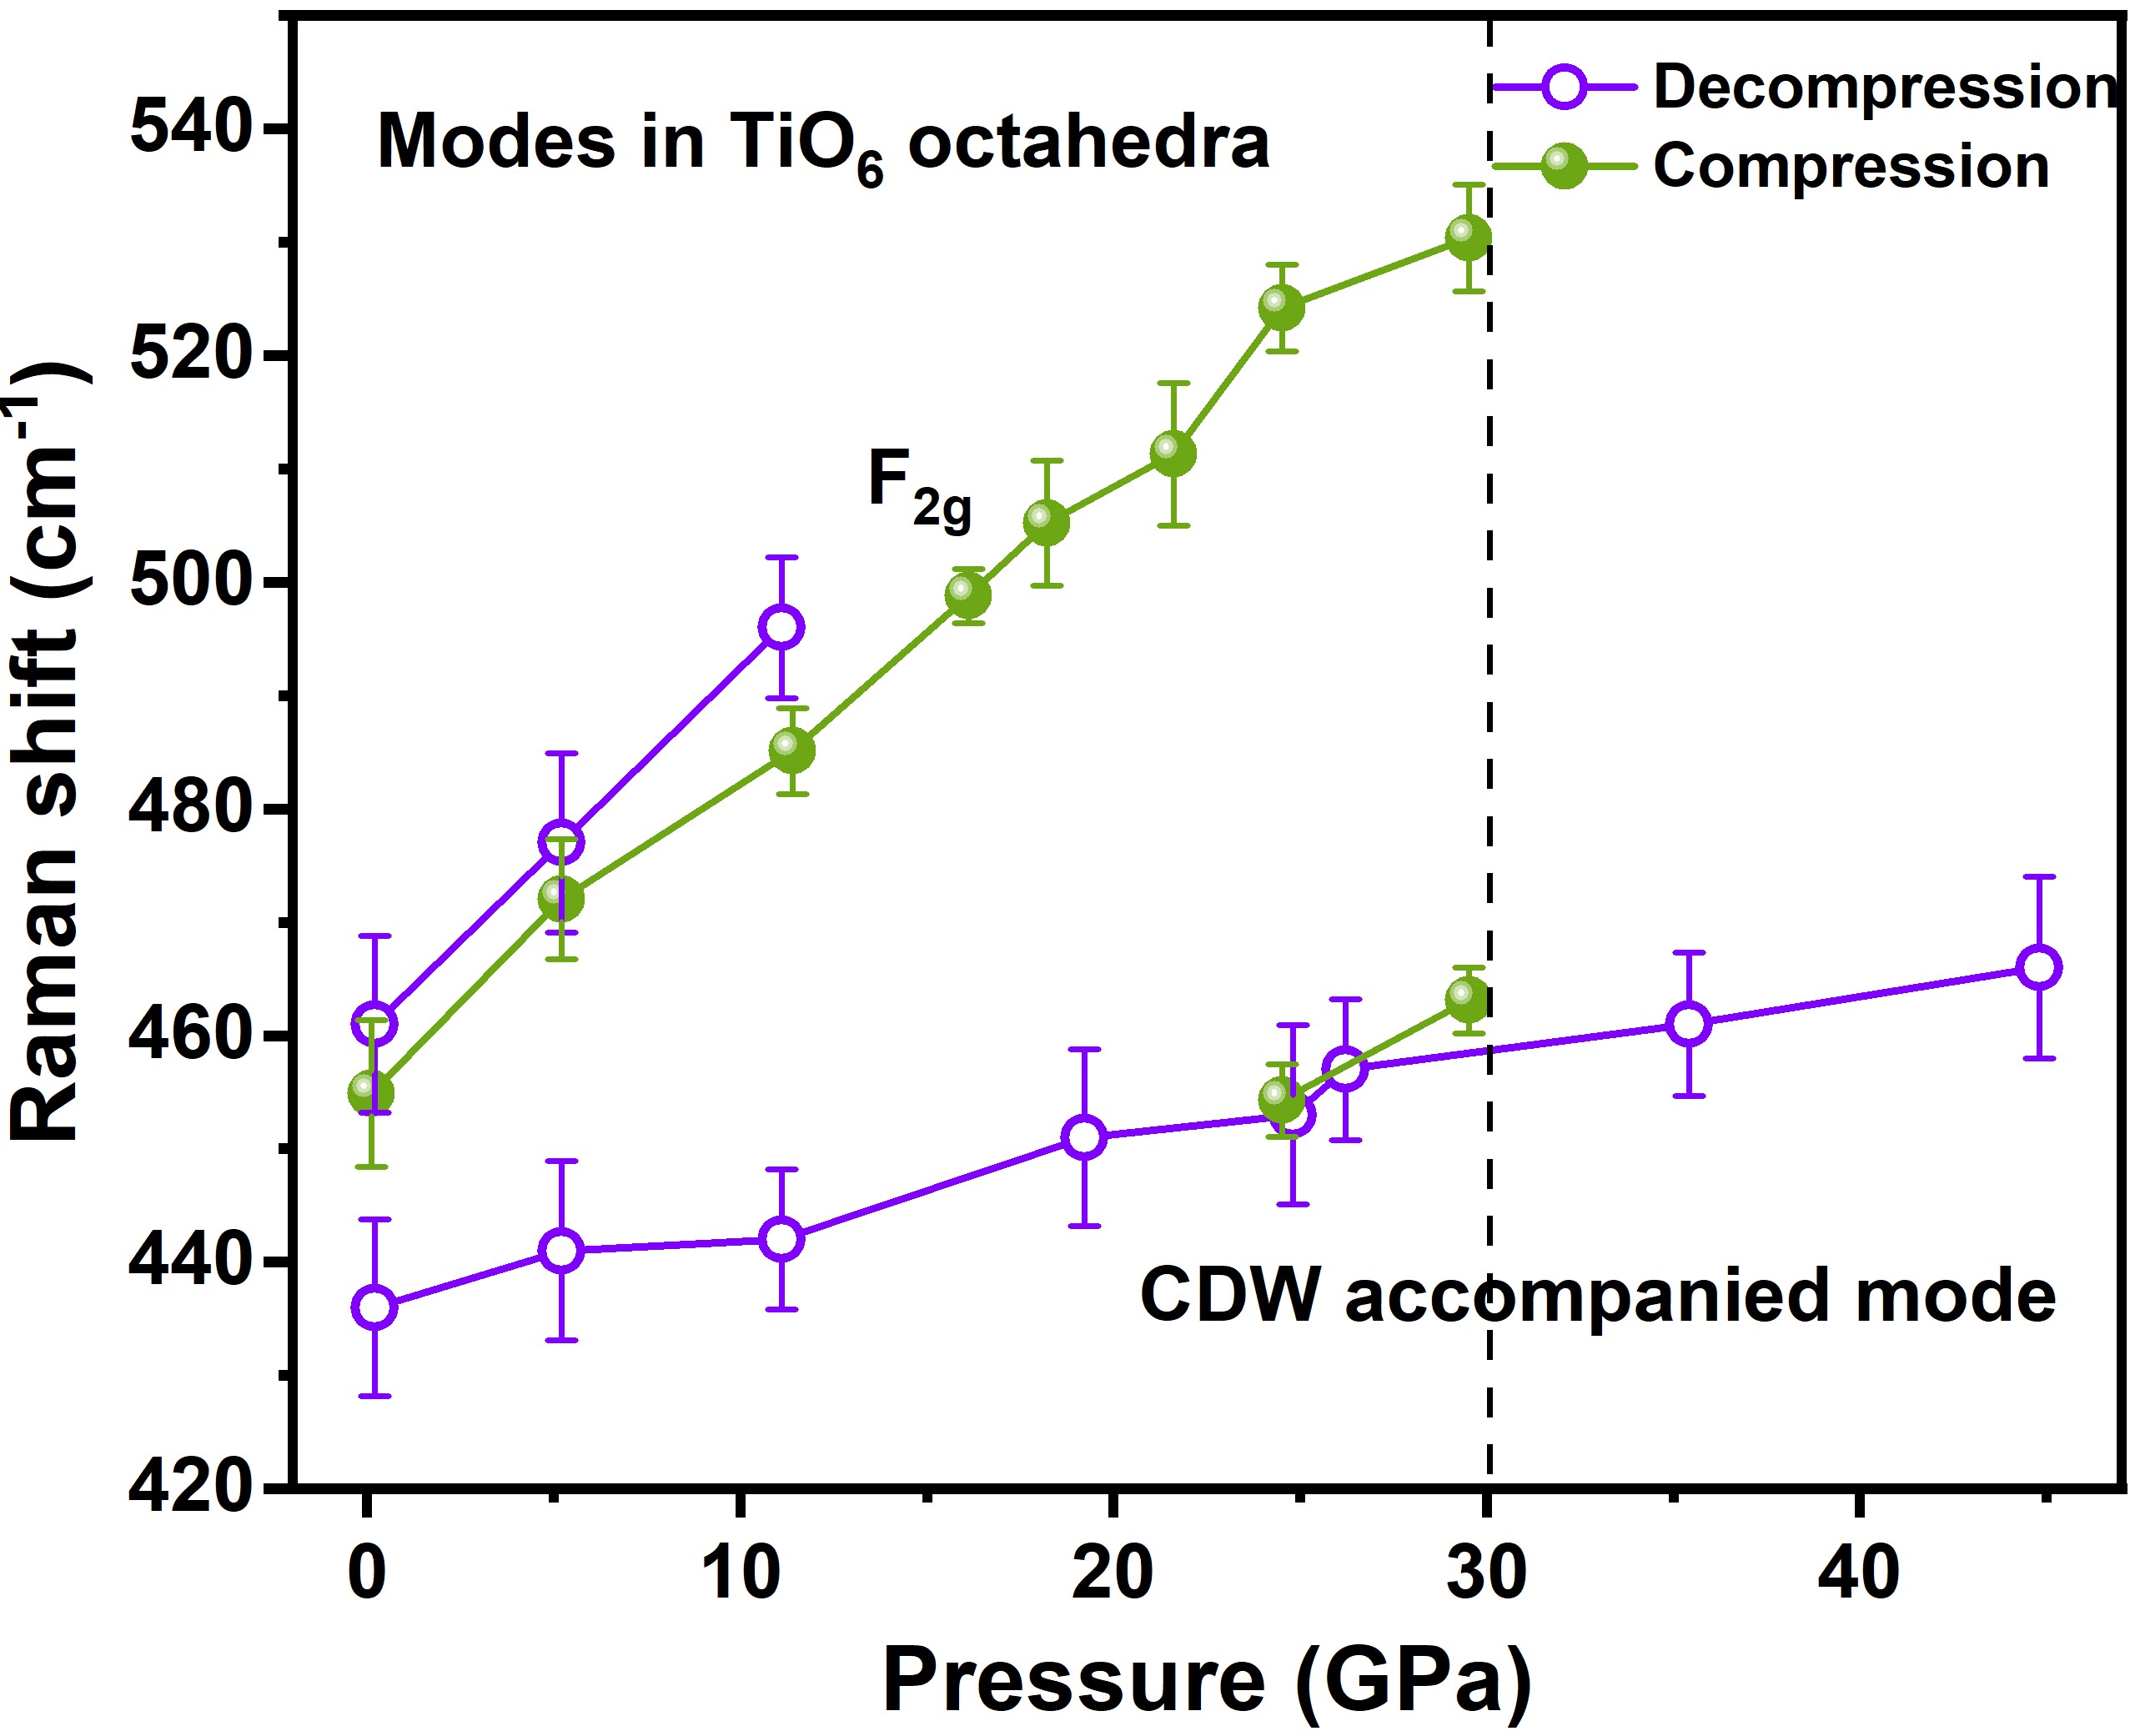


**Figure S7** The pressure dependence of frequency in TiO6 octahedral modes. We are unable to track the reemergence of LTO *F*2g mode (460 cm–1 at 1 atm), suggesting potential topological behavior similar to that in isostructural pyrochlore Gd2Ti2O7 and Tb2Ti2O7.1-3

**S8.** **The fitting plots of** **Lu2Ti2O7 after release to ambient conditions**


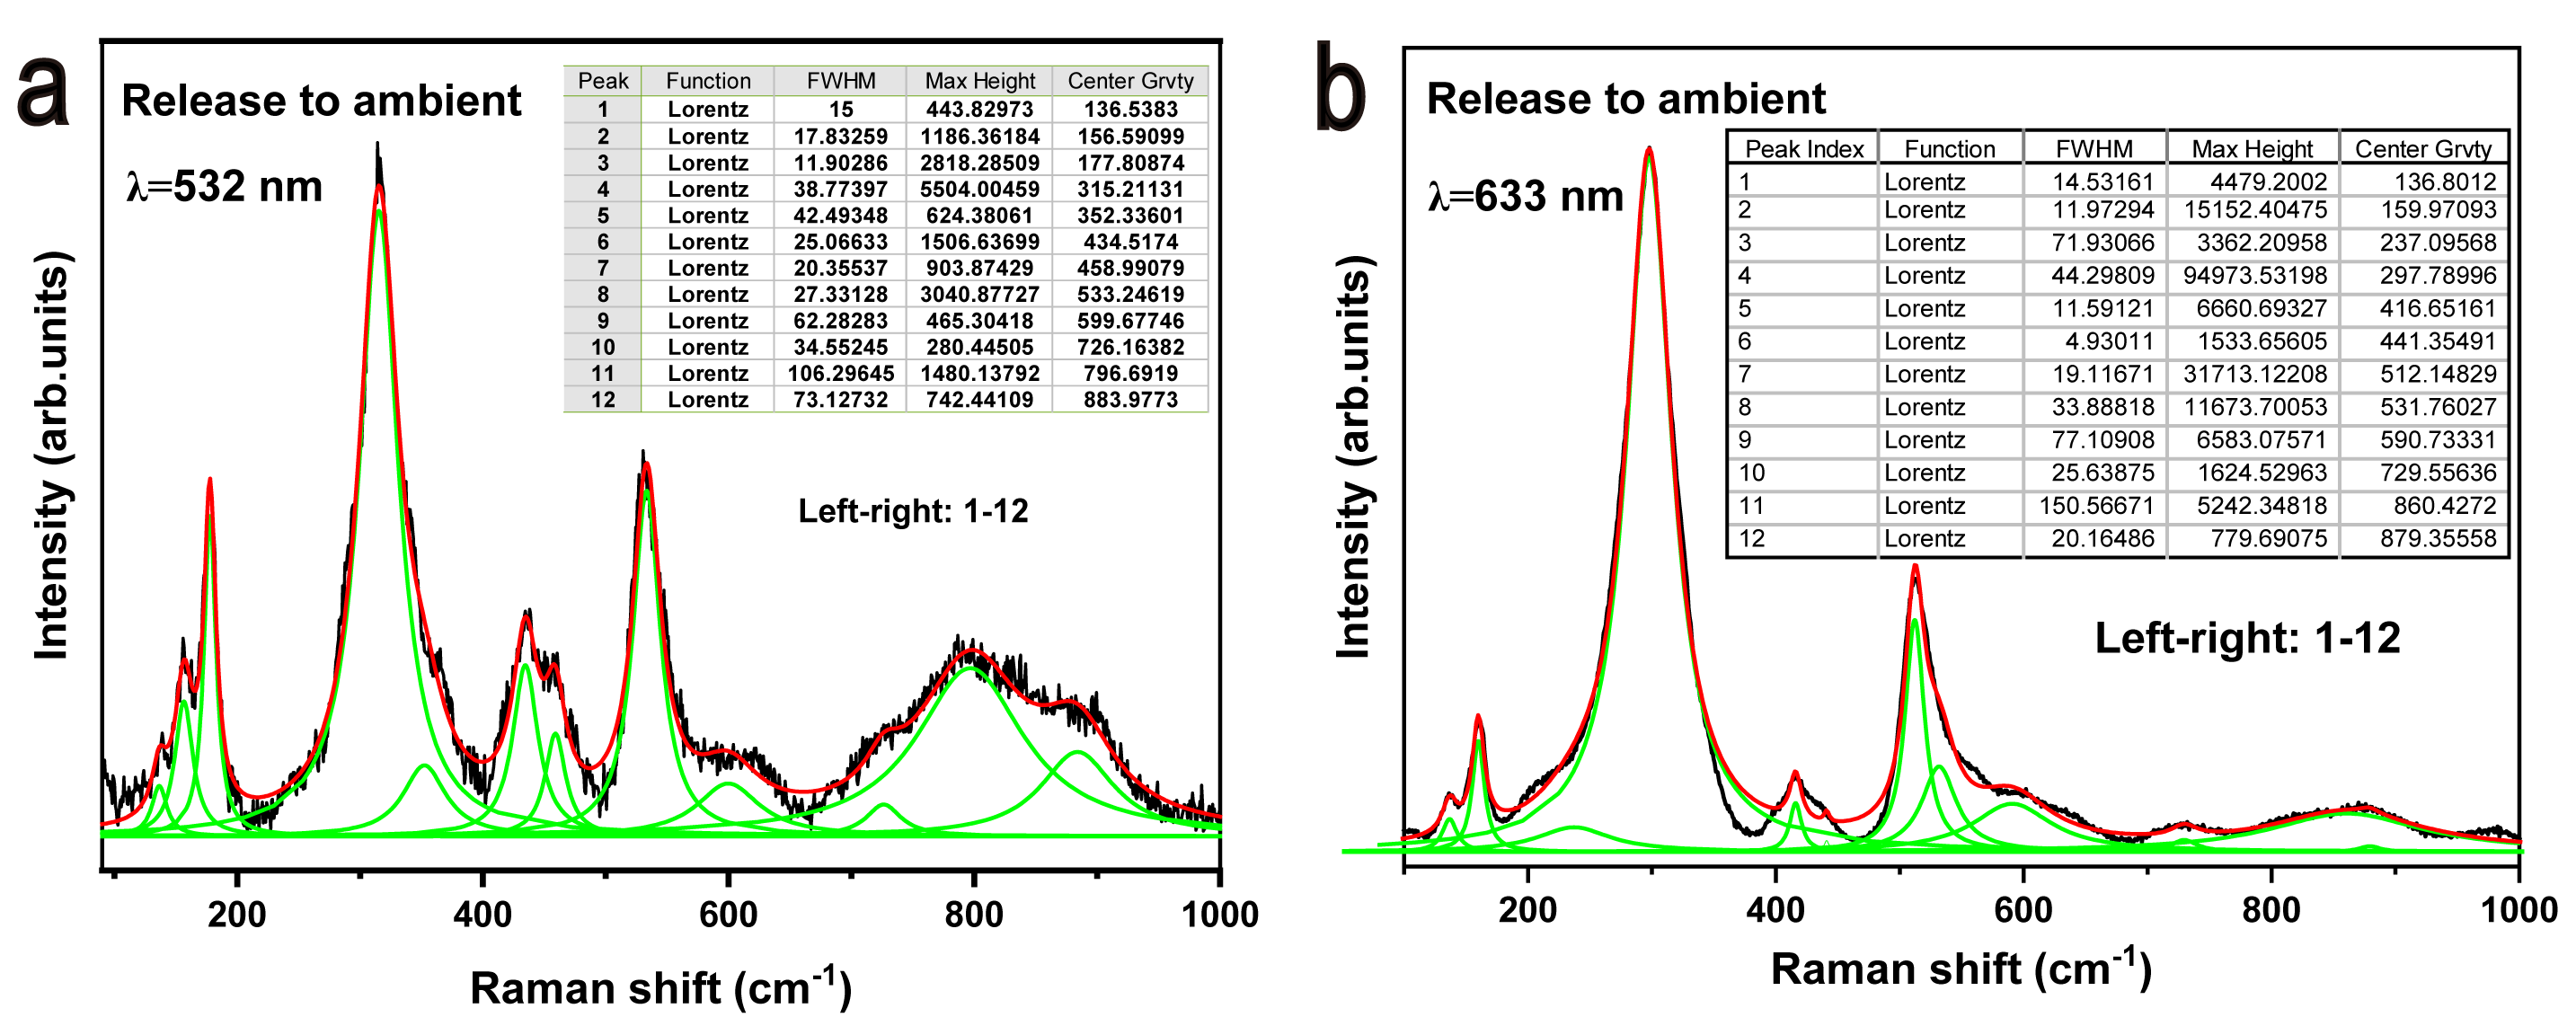


**Fig. S8** The fitting plots of Lu2Ti2O7 after release to ambient conditions. Wavelength is (a) 532 and (b) 633 nm, respectively. The PTM in (a) is silicone oil and in (b) is neon.

**S9. Selected SAED patterns in Lu2Ti2O7 thin film**


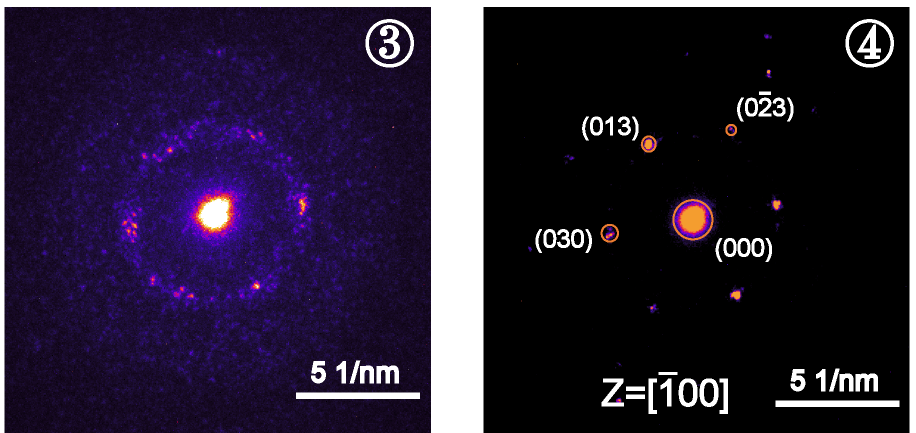


**Fig. S9** Selected SAED patterns in cross-sectional FIB image of the (010) Lu2Ti2O7 thin film.

**S10.** **Nanostructure made of amorphized structural matrix**


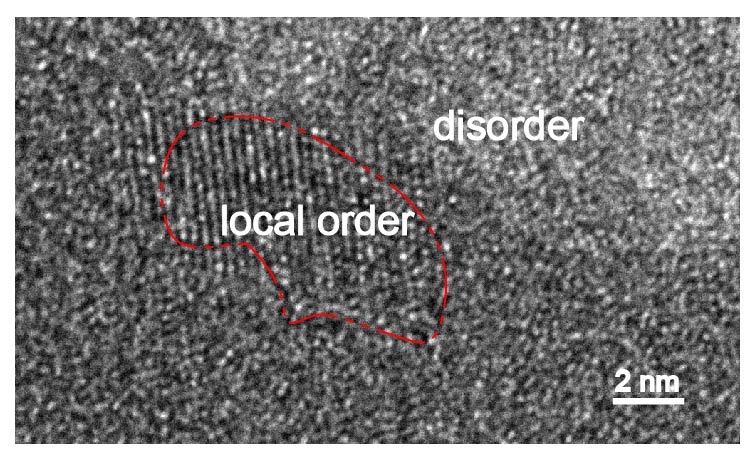


**Fig. S10** Nanostructure made of amorphized structural matrix.

**References:**

1. Mirebeau, I.; Goncharenko, I. N.; Cadavez-Peres, P.; Bramwell, S. T.; Gingras, M. J. P.; Gardner, J. S., Pressure-induced crystallization of a spin liquid. *Nature* **2002,** *420*, 54-57.

2. Saha, S.; Muthu, D. V. S.; Pascanut, C.; Dragoe, N.; Suryanarayanan, R.; Dhalenne, G.; Revcolevschi, A.; Karmakar, S.; Sharma, S. M.; Sood, A. K., High-pressure Raman and X-ray study of the spin-frustrated pyrochlore Gd2Ti2O7. *Physical Review B* **2006,** *74* (6).

3. Semeghini, G.; Levine, H.; Keesling, A.; Ebadi, S.; Wang, T. T.; Bluvstein, D.; Verresen, R.; Pichler, H.; Kalinowski, M.; Samajdar, R.; Omran, A.; Sachdev, S.; Vishwanath, A.; Greiner, M.; Vuletic´, V.; Lukin, M. D., Probing topological spin liquids on a programmable quantum simulator. *Science* **2021,** *374*, 1242-1247.
